# Supplementary material
Source: PubMed Central journal article supplement (PMC3811524)
Supplement: AEM.02495-13_zam999104858so1.pdf [file AEM.02495-13_zam999104858so1.pdf]

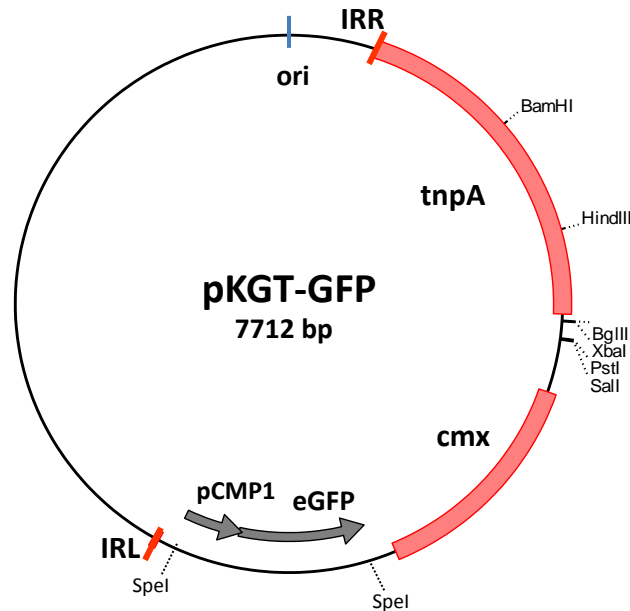

**FIGURE S1.** Physical map of the plasmid, pKGT-GFP, expressing the green fluorescent protein gene (*egfp*). A PCR-generated DNA fragment carrying the *egfp* (eGFP) gene and a sequence derived from *Cmm* bacteriophage CMP1 (pCMP1) was inserted into the unique *speI* restriction site of the Tn1409 transposon vector pKGT452C $\beta$ . *cmx* = chloramphenicol resistance gene, *ori* = origin of replication of the vector pUC13, *tnpA* = transposase IS 1409, IRL = left inverted repeat, IRR = right inverted repeat.
